# Supplementary material
Source: PubMed Central journal article supplement (PMC5117821)
Supplement: NIHMS810295-supplement.pdf [file NIHMS810295-supplement.pdf]

## **SUPPLEMENTAL MATERIAL**

**Supplemental Table 1. Baseline characteristics of REGARDS participants by presence and absence of insulin-use and albuminuria**

**Supplemental Table 2. Incidence rates and adjusted hazard ratios and 95% confidence intervals for coronary heart disease events, myocardial infarction and fatal coronary heart disease according to severity of diabetes (insulin use and albuminuria separately) and prevalent coronary heart disease status at baseline**

**Supplemental Table 3. Incidence rates and adjusted hazard ratios and 95% confidence intervals for total coronary heart disease events according to diabetes and prevalent coronary heart disease status at baseline, stratified by age**

**Supplemental Figure 1. Cumulative incidence of A. myocardial infarction and B. fatal coronary heart disease by prevalent coronary heart disease and diabetes status**

**Supplemental Figure 2. Cumulative incidence of coronary heart disease by A. prevalent coronary heart disease and diabetes (insulin users and non-insulin users) status and B. prevalent coronary heart disease and diabetes (those with and without albuminuria) status**

**Supplemental Figure 3. Cumulative incidence of A. myocardial infarction and B. fatal coronary heart disease by prevalent coronary heart disease and diabetes (insulin use and/or presence of albuminuria) status**

**Supplemental Figure 4. Cumulative incidence of A. myocardial infarction and B. fatal coronary heart disease by prevalent coronary heart disease and diabetes (insulin users and non-insulin users) status**

**Supplemental Figure 5. Cumulative incidence of A. myocardial infarction and B. fatal coronary heart disease by prevalent coronary heart disease and diabetes (those with and without albuminuria) status**

**Supplemental Table 1. Baseline characteristics of REGARDS participants by presence and absence of insulin-use and albuminuria**

| Characteristics                            | Diabetes only‡         |                              |                          |                              |
|--------------------------------------------|------------------------|------------------------------|--------------------------|------------------------------|
|                                            | Insulin use<br>n = 973 | Non-insulin use<br>n = 3,039 | Albuminuria<br>n = 1,131 | No albuminuria<br>n = 2, 881 |
| Age, years, mean ± SD                      | 65.0 ± 8.6             | 64.9 ± 8.7                   | 65.7 ± 8.5               | 67.4 ± 8.2                   |
| Black, n (%)                               | 698 (71.7)             | 1,775 (58.4)                 | 753 (66.6)               | 1,720 (59.7)                 |
| Female, n (%)                              | 560 (57.6)             | 1, 717 (56.5)                | 614 (54.3)               | 1, 663 (57.7)                |
| Region, n (%)                              |                        |                              |                          |                              |
| Stroke belt*                               | 345 (35.5)             | 1,133 (37.3)                 | 421 (37.2)               | 1,057 (36.7)                 |
| Stroke buckle†                             | 232 (23.8)             | 656 (21.6)                   | 245 (21.7)               | 643 (22.3)                   |
| Non-stroke belt or buckle                  | 396 (40.7)             | 1,250 (41.1)                 | 465 (41.1)               | 1,181 (41.0)                 |
| Annual household income <\$20,000, n (%)   | 295 (35.2)             | 713 (26.5)                   | 349 (35.3)               | 659 (25.9)                   |
| Education ≤ High school, n (%)             | 490 (50.5)             | 1,393 (45.9)                 | 568 (50.3)               | 1,315 (45.7)                 |
| Fasting blood glucose, mg/dL, mean ± SD    | 145.9 ± 73.6           | 136.5 ± 47.9                 | 150.1 ± 68.2             | 134.3 ± 48.1                 |
| Diabetes treatment, n (%)                  |                        |                              |                          |                              |
| No pharmacologic treatment                 | 0 (0.0)                | 496 (16.3)                   | 91 (8.0)                 | 405 (14.1)                   |
| Oral medications                           | 0 (0.0)                | 2,543 (83.7)                 | 624 (55.2)               | 1,919 (66.6)                 |
| Insulin                                    | 514 (52.8)             | 0 (0.0)                      | 243 (21.5)               | 271 (9.4)                    |
| Both oral medications and insulin          | 459 (47.2)             | 0 (0.0)                      | 173 (15.3)               | 286 (9.9)                    |
| Systolic blood pressure, mm Hg, mean ± SD  | 133.9 ± 18.3           | 131.0 ± 16.4                 | 137.2 ± 18.1             | 129.6 ± 16.0                 |
| Diastolic blood pressure, mm Hg, mean ± SD | 76.9 ± 10.9            | 77.0 ± 9.8                   | 78.5 ± 11.1              | 76.4 ± 9.7                   |
| Hypertension prevalence, n (%)             | 779 (80.2)             | 2,332 (76.7)                 | 941 (83.2)               | 2, 170 (75.4)                |
| Smoker, n (%)                              |                        |                              |                          |                              |
| Current                                    | 118 (12.2)             | 430 (14.2)                   | 186 (16.5)               | 362 (12.6)                   |
| Never                                      | 453 (46.7)             | 1,381 (45.6)                 | 494 (43.8)               | 1, 340 (46.7)                |
| Past                                       | 400 (41.2)             | 1,216 (40.2)                 | 447 (39.7)               | 1,169 (40.7)                 |
| Total Cholesterol, mg/dL, mean ± SD        | 178.3 ± 40.5           | 184.0 ± 41.1                 | 186.8 ± 44.7             | 181.0 ± 39.4                 |

|                                                                                      |              |              |               |              |
|--------------------------------------------------------------------------------------|--------------|--------------|---------------|--------------|
| <b>HDL-C, mg/dL, mean ± SD</b>                                                       | 49.0 ± 15.0  | 47.6 ± 13.9  | 47.2 ± 14.4   | 48.2 ± 14.1  |
| <b>LDL-C, mg/dL, mean ± SD</b>                                                       | 102.2 ± 34.6 | 106.6 ± 34.7 | 109.0 ± 37.9  | 104.2 ± 33.3 |
| <b>Triglycerides, mg/dL, mean ± SD</b>                                               | 132.8 ± 93.1 | 150.3 ± 99.1 | 156.6 ± 119.2 | 142.1 ± 88.1 |
| <b>Other medication use, n (%)</b>                                                   |              |              |               |              |
| <b>Aspirin</b>                                                                       | 499 (51.3)   | 1,418 (46.7) | 528 (46.7)    | 1,389 (48.3) |
| <b>Statins</b>                                                                       | 457 (47.0)   | 1,262 (41.5) | 492 (43.5)    | 1,227 (42.6) |
| <b>ACE inhibitors or ARBs</b>                                                        | 708 (72.8)   | 1,751 (57.6) | 746 (66.0)    | 1,713 (59.5) |
| <b>BMI, kg/m<sup>2</sup>, mean ± SD</b>                                              | 33.4 ± 7.3   | 32.2 ± 6.5   | 32.5 ± 6.8    | 32.5 ± 6.7   |
| <b>Physical activity, n (%)</b>                                                      |              |              |               |              |
| <b>None</b>                                                                          | 414 (43.1)   | 1,136 (37.9) | 687 (45.6)    | 5,272 (31.2) |
| <b>1-3 times per week</b>                                                            | 308 (32.1)   | 1,113 (37.2) | 449 (29.8)    | 6,380 (37.8) |
| <b>4+ times per week</b>                                                             | 238 (24.8)   | 746 (24.9)   | 258 (23.0)    | 726 (25.6)   |
| <b>C-reactive protein, mg/L, n (%)</b>                                               |              |              |               |              |
| <b>&lt;1</b>                                                                         | 175 (19.5)   | 588 (20.5)   | 183 (17.5)    | 580 (21.3)   |
| <b>1 to 3</b>                                                                        | 248 (27.7)   | 883 (30.8)   | 291 (27.7)    | 840 (30.9)   |
| <b>&gt;3</b>                                                                         | 474 (52.8)   | 1,401 (48.8) | 575 (54.8)    | 1,300 (47.8) |
| <b>Estimated glomerular filtration rate, &lt;60 mL/min/1.73 m<sup>2</sup>, n (%)</b> | 229 (25.1)   | 352 (12.0)   | 290 (27.2)    | 291 (10.5)   |
| <b>Ratio of albumin to creatinine, ≥ 30 mg/g, n (%)</b>                              | 416 (42.8)   | 715 (23.5)   | 1,131 (100.0) | 0 (0.0)      |

Abbreviations: REGARDS, Reasons for Geographic and Racial Differences in Stroke; LDL-C, low-density lipoprotein-cholesterol; HDL-C, high-density lipoprotein-cholesterol

\*Defined as the states of Alabama, Arkansas, Louisiana, Mississippi, Tennessee and the noncoastal regions of North Carolina, South Carolina and Georgia.

†Defined as the coastal regions of North Carolina, South Carolina and Georgia.

‡Diabetes was defined as blood glucose (fasting ≥ 126 mg/dL or non-fasting ≥ 200 mg/dL) or self-reported use of diabetes medication.

The frequencies and percentages may not add up to the total sample size due to missing data.

**Supplemental Table 2. Incidence rates and adjusted hazard ratios and 95% confidence intervals for coronary heart disease events, myocardial infarction and fatal coronary heart disease according to severity of diabetes (insulin use and albuminuria separately) and prevalent coronary heart disease status at baseline**

|                                  | Prevalent CHD only§ |                    | Diabetes only          |                    |                       |
|----------------------------------|---------------------|--------------------|------------------------|--------------------|-----------------------|
|                                  |                     | <i>Insulin use</i> | <i>Non-insulin use</i> | <i>Albuminuria</i> | <i>No albuminuria</i> |
| <b>CHD</b>                       |                     |                    |                        |                    |                       |
| <b>Number of events</b>          | 332                 | 88                 | 160                    | 106                | 142                   |
| <b>Person-years of follow up</b> | 16,654              | 5,084              | 16,908                 | 5,811              | 16,182                |
| <b>Incidence rate (95% CI)*</b>  | 19.9 (17.8, 22.0)   | 17.3 (13.7, 20.9)  | 9.5 (8.0, 10.9)        | 18.2 (14.8, 21.7)  | 8.8 (7.3, 10.2)       |
| <b>Hazard Ratio (95% CI)†</b>    | 1.0 (Reference)     | 1.15 (0.90, 1.47)  | 0.62 (0.51, 0.75)      | 1.15 (0.92, 1.44)  | 0.58 (0.47, 0.71)     |
| <b>Hazard Ratio (95% CI)‡</b>    | 1.0 (Reference)     | 0.91 (0.71, 1.17)  | 0.57 (0.47, 0.69)      | 0.90 (0.71, 1.13)  | 0.59 (0.48, 0.72)     |
| <b>MI</b>                        |                     |                    |                        |                    |                       |
| <b>Number of events</b>          | 238                 | 60                 | 124                    | 78                 | 106                   |
| <b>Person-years of follow up</b> | 16,654              | 5,084              | 16,908                 | 5,811              | 16,182                |
| <b>Incidence rate (95% CI)*</b>  | 14.3 (12.5, 16.1)   | 11.8 (8.8, 14.8)   | 7.3 (6.0, 8.6)         | 13.4 (10.4, 16.4)  | 6.6 (5.3, 8.0)        |
| <b>Hazard Ratio (95% CI)†</b>    | 1.0 (Reference)     | 1.16 (0.87, 1.55)  | 0.69 (0.55, 0.86)      | 1.24 (0.95, 1.61)  | 0.63 (0.49, 0.79)     |
| <b>Hazard Ratio (95% CI)‡</b>    | 1.0 (Reference)     | 0.92 (0.68, 1.25)  | 0.64 (0.51, 0.80)      | 0.98 (0.75, 1.28)  | 0.64 (0.50, 0.81)     |
| <b>Fatal CHD</b>                 |                     |                    |                        |                    |                       |
| <b>Number of events</b>          | 132                 | 34                 | 52                     | 37                 | 49                    |
| <b>Person-years of follow up</b> | 16,654              | 5,084              | 16,908                 | 5,811              | 16,182                |
| <b>Incidence rate (95% CI)*</b>  | 7.9 (6.6, 9.3)      | 6.7 (4.4, 8.9)     | 3.1 (2.2, 3.9)         | 6.4 (4.3, 8.4)     | 3.0 (2.2, 3.9)        |
| <b>Hazard Ratio (95% CI)†</b>    | 1.0 (Reference)     | 1.05 (0.71, 1.55)  | 0.49 (0.36, 0.69)      | 0.96 (0.66, 1.40)  | 0.49 (0.35, 0.69)     |
| <b>Hazard Ratio (95% CI)‡</b>    | 1.0 (Reference)     | 0.80 (0.54, 1.21)  | 0.44 (0.32, 0.62)      | 0.71 (0.49, 1.05)  | 0.50 (0.35, 0.70)     |

Abbreviations: CHD, coronary heart disease; MI, myocardial infarction; CHD only; prevalent coronary heart disease; CI, confidence interval

\*Per 1,000 person years

†Adjusted for age (continuous), race (categorical), sex (categorical) and region of residence (categorical) for the overall models.

‡Adjusted for model 1 covariates, income (categorical) and education (categorical), systolic and diastolic blood pressure (continuous), hypertension (hypertensive based on SBP, DBP and self-reported use of antihypertensive medications) (categorical), cigarette smoking (categorical), total cholesterol (continuous),

HDL cholesterol (continuous), triglycerides (continuous) and use of other medications (aspirin; statins; ACE inhibitors or ARBs) (categorical), BMI (continuous), physical activity (categorical), C-reactive protein (categorical), estimated glomerular filtration rate (categorical), urinary albumin to creatinine ratio (categorical) with the exclusion of urinary albumin to creatinine ratio (categorical) for models with diabetes severity based on presence of albuminuria as the exposure. §CHD was assessed using ECG evidence of MI or self-report of MI or revascularization. ||Diabetes was defined as blood glucose (fasting  $\geq 126$  mg/dL or non-fasting  $\geq 200$  mg/dL) or self-reported use of diabetes medication.

**Supplemental Table 3. Incidence rates and adjusted hazard ratios and 95% confidence intervals for total coronary heart disease events according to diabetes and prevalent coronary heart disease status at baseline, stratified by age**

| <b>Age &lt; 65 years</b>                        |                            |                        |                                   |                                           |
|-------------------------------------------------|----------------------------|------------------------|-----------------------------------|-------------------------------------------|
|                                                 | <b>Prevalent CHD only§</b> | <b>Diabetes only  </b> | <b>Diabetes and prevalent CHD</b> | <b>Neither diabetes nor prevalent CHD</b> |
| <b>CHD</b>                                      |                            |                        |                                   |                                           |
| <b>Number of events</b>                         | 80                         | 98                     | 86                                | 186                                       |
| <b>Person-years of follow up</b>                | 5,567                      | 11,210                 | 3,009                             | 55,173                                    |
| <b>Incidence rate (95% CI)*</b>                 | 14.4 (11.2, 17.5)          | 8.7 (7.0, 10.4)        | 28.6 (22.6, 34.6)                 | 3.4 (2.9, 3.9)                            |
| <b>Hazard Ratio (95% CI)†</b>                   | 1.0 (Reference)            | 0.68 (0.51, 0.92)      | 2.01 (1.48, 2.73)                 | 0.27 (0.21, 0.36)                         |
| <b>Hazard Ratio (95% CI)‡</b>                   | 1.0 (Reference)            | 0.61 (0.45, 0.82)      | 1.53 (1.12, 2.10)                 | 0.32 (0.24, 0.41)                         |
| <b>Age ≥ 65 years</b>                           |                            |                        |                                   |                                           |
|                                                 | <b>Prevalent CHD only§</b> | <b>Diabetes only  </b> | <b>Diabetes and prevalent CHD</b> | <b>Neither diabetes nor prevalent CHD</b> |
| <b>CHD</b>                                      |                            |                        |                                   |                                           |
| <b>Number of events</b>                         | 252                        | 150                    | 186                               | 347                                       |
| <b>Person-years of follow up</b>                | 11,087                     | 10,783                 | 4,694                             | 44,675                                    |
| <b>Incidence rate (95% CI)*</b>                 | 22.7 (19.9, 25.5)          | 13.9 (11.7, 16.1)      | 39.6 (33.9, 45.3)                 | 7.8 (7.0, 8.6)                            |
| <b>Hazard Ratio (95% CI)†</b>                   | 1.0 (Reference)            | 0.74 (0.60, 0.91)      | 1.89 (1.56, 2.29)                 | 0.41 (0.35, 0.48)                         |
| <b>Hazard Ratio (95% CI)‡</b>                   | 1.0 (Reference)            | 0.65 (0.52, 0.80)      | 1.51 (1.24, 1.85)                 | 0.45 (0.38, 0.53)                         |
| <b>P for difference in hazard ratios by age</b> |                            | 0.74                   | 0.95                              | 0.03                                      |

Abbreviations: CHD, coronary heart disease events; MI, myocardial infarction; CHD only; prevalent coronary heart disease; diabetes and CHD, diabetes and prevalent coronary heart disease; neither diabetes nor CHD, neither diabetes nor prevalent coronary heart disease; CI, confidence interval

\*Per 1,000 person years

†Adjusted for age (continuous), race (categorical), sex (categorical) and region of residence (categorical).

‡Adjusted for model 1 covariates, income (categorical) and education (categorical), systolic and diastolic blood pressure (continuous), hypertension (hypertensive based on SBP, DBP and self-reported use of antihypertensive medications) (categorical), cigarette smoking (categorical), total cholesterol (continuous), HDL cholesterol (continuous), triglycerides (continuous) and use of other medications (aspirin; statins; ACE inhibitors or ARBs) (categorical), BMI (continuous), physical activity (categorical), C-reactive protein (categorical), estimated glomerular filtration rate (categorical), urinary albumin to creatinine ratio (categorical).

§CHD was assessed using ECG evidence of MI or self-report of MI or revascularization.

||Diabetes was defined as blood glucose (fasting ≥ 126 mg/dL or non-fasting ≥ 200 mg/dL) or self-reported use of diabetes medication.

P for omnibus interaction test = 0.04

**Supplemental Figure 1. Cumulative incidence of A. myocardial infarction and B. fatal coronary heart disease by prevalent coronary heart disease and diabetes status**

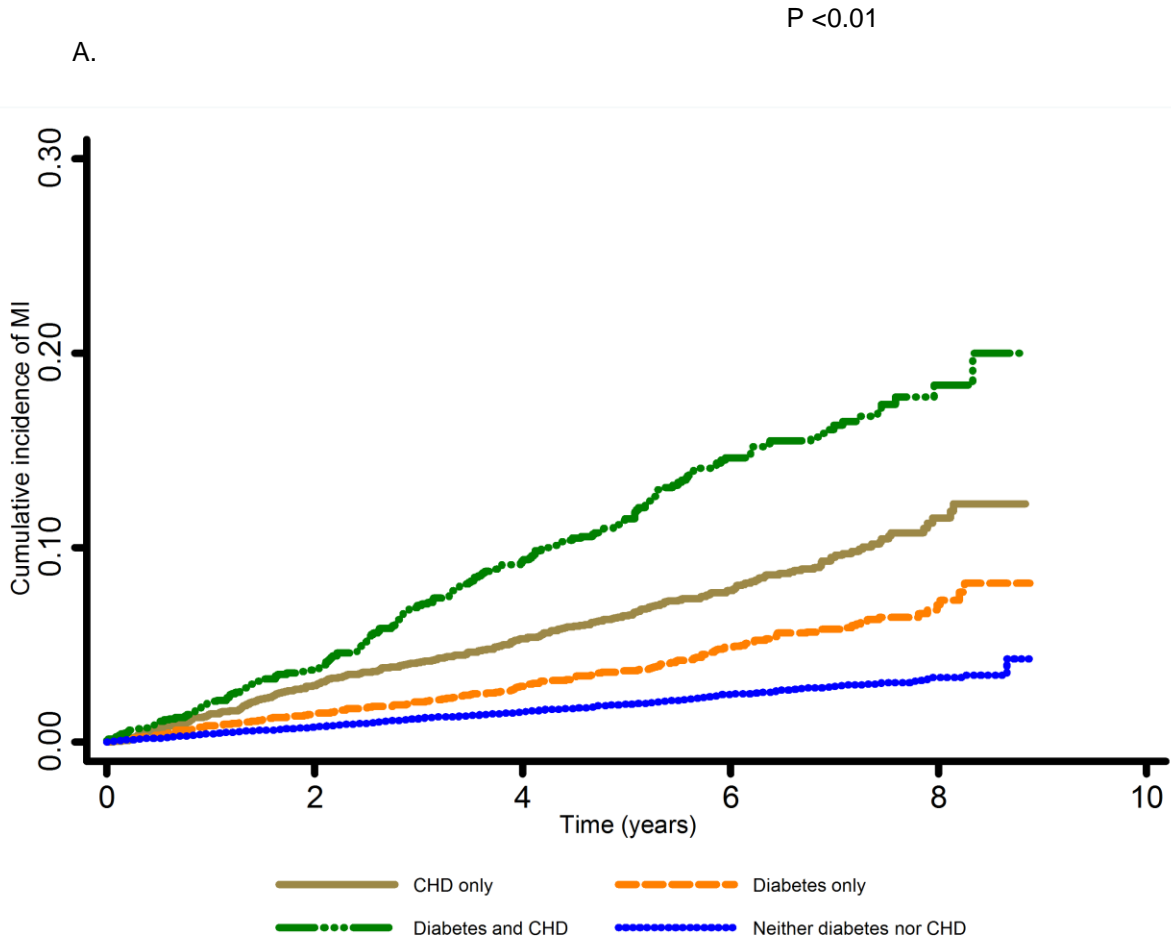

Abbreviations: MI, myocardial infarction; CHD only; prevalent coronary heart disease; diabetes and CHD, diabetes and prevalent coronary heart disease; neither diabetes nor CHD, neither diabetes nor prevalent coronary heart disease  
 Exposure groups: CHD only, Diabetes only, Diabetes and CHD, Neither diabetes nor CHD.  
 CHD was assessed using ECG evidence of MI or self-report of MI or revascularization.  
 Diabetes was defined as blood glucose (fasting  $\geq 126$  mg/dL or non-fasting  $\geq 200$  mg/dL) or self-reported use of diabetes medication.  
 Outcome: Y-axis



B.

P <0.01

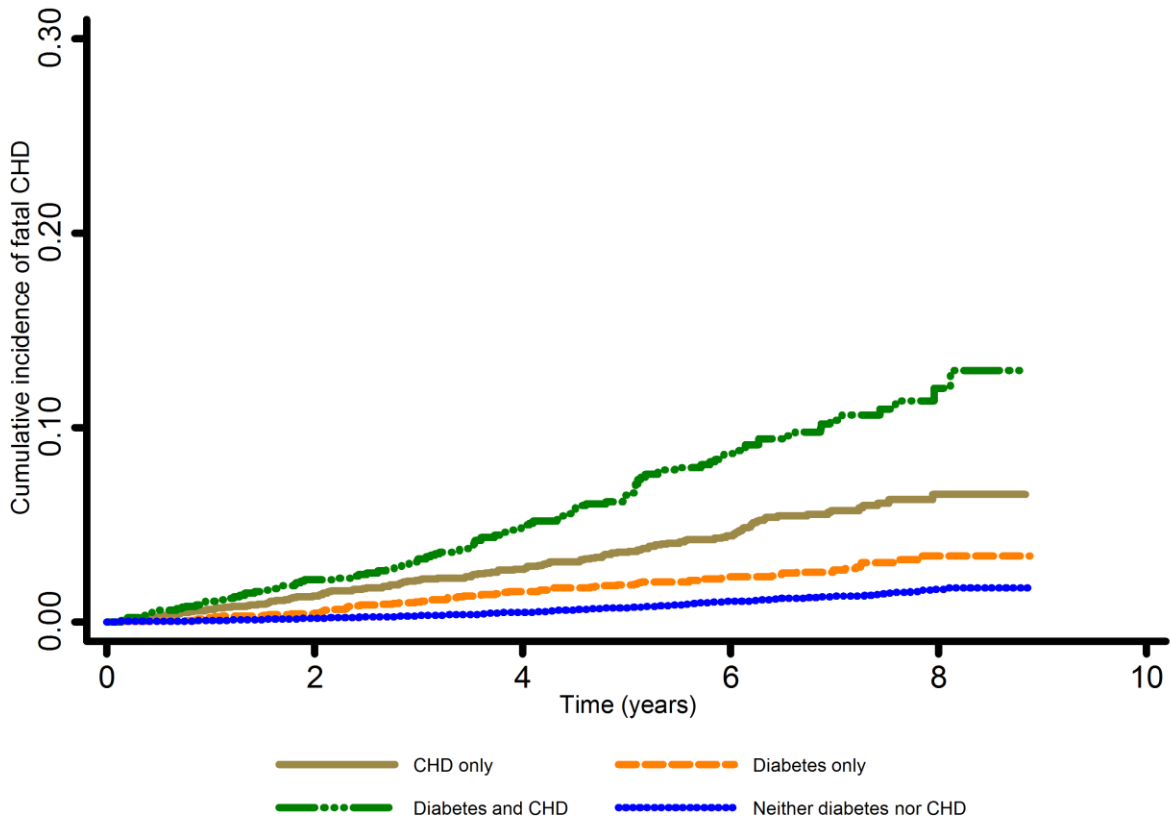

Abbreviations: Fatal CHD, fatal coronary heart disease; CHD only; prevalent coronary heart disease; diabetes and CHD, diabetes and prevalent coronary heart disease; neither diabetes nor CHD, neither diabetes nor prevalent coronary heart disease  
Exposure groups: CHD only, Diabetes only, Diabetes and CHD, Neither diabetes nor CHD.  
CHD was assessed using ECG evidence of MI or self-report of MI or revascularization.  
Diabetes was defined as blood glucose (fasting  $\geq 126$  mg/dL or non-fasting  $\geq 200$  mg/dL) or self-reported use of diabetes medication.  
Outcome: Y-axis

**Supplemental Figure 2. Cumulative incidence of coronary heart disease by A. prevalent coronary heart disease and diabetes (insulin users and non-insulin users) status and B. prevalent coronary heart disease and diabetes (those with and without albuminuria) status**

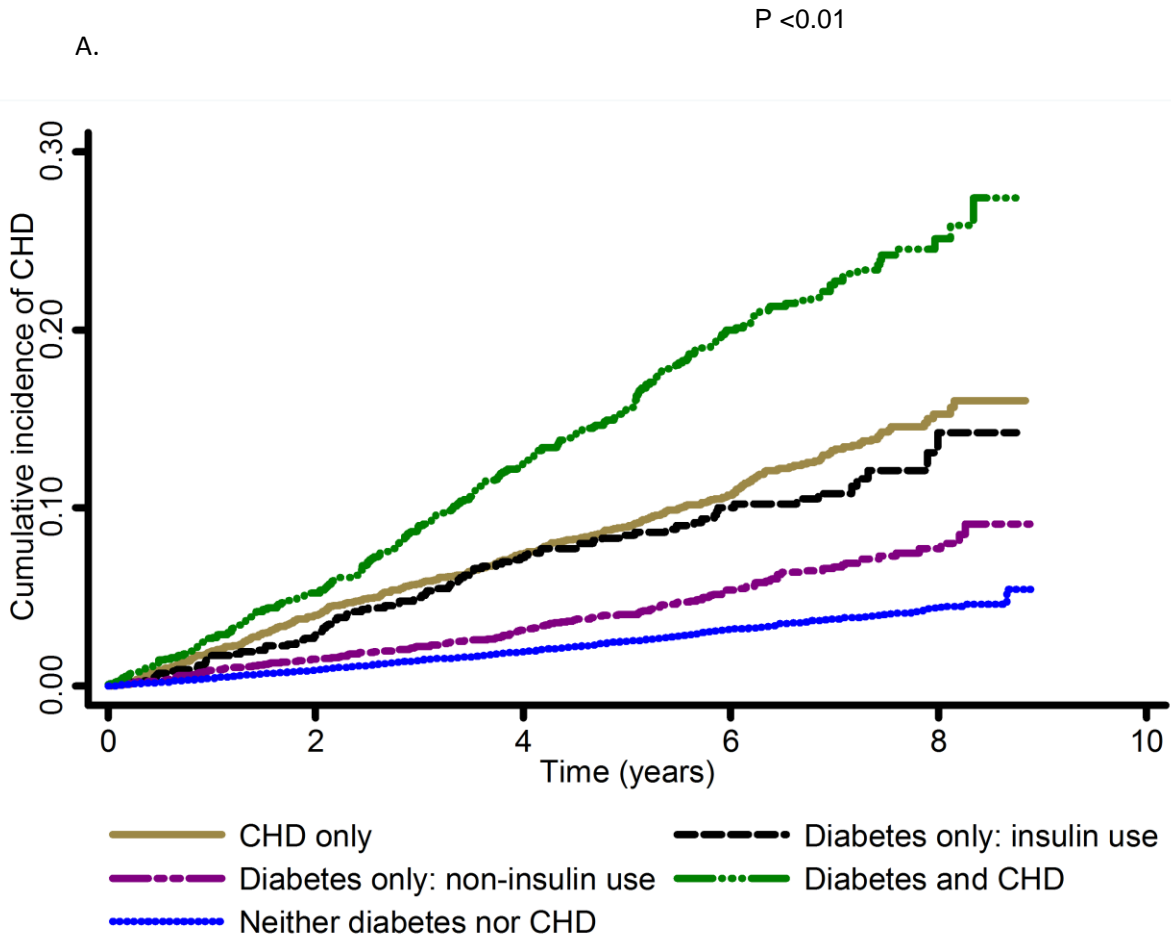

Abbreviations: CHD, coronary heart disease; CHD only, prevalent coronary heart disease; diabetes and CHD, diabetes and prevalent coronary heart disease; neither diabetes nor CHD, neither diabetes nor prevalent coronary heart disease  
 Exposure groups: CHD only, Diabetes only: insulin use, Diabetes only: non-insulin use, Diabetes and CHD, Neither diabetes nor CHD  
 CHD was assessed using ECG evidence of MI or self-report of MI or revascularization.  
 Diabetes was defined as blood glucose (fasting  $\geq 126$  mg/dL or non-fasting  $\geq 200$  mg/dL) or self-reported use of diabetes medication.  
 Outcome: Y-axis

P < 0.01

B.

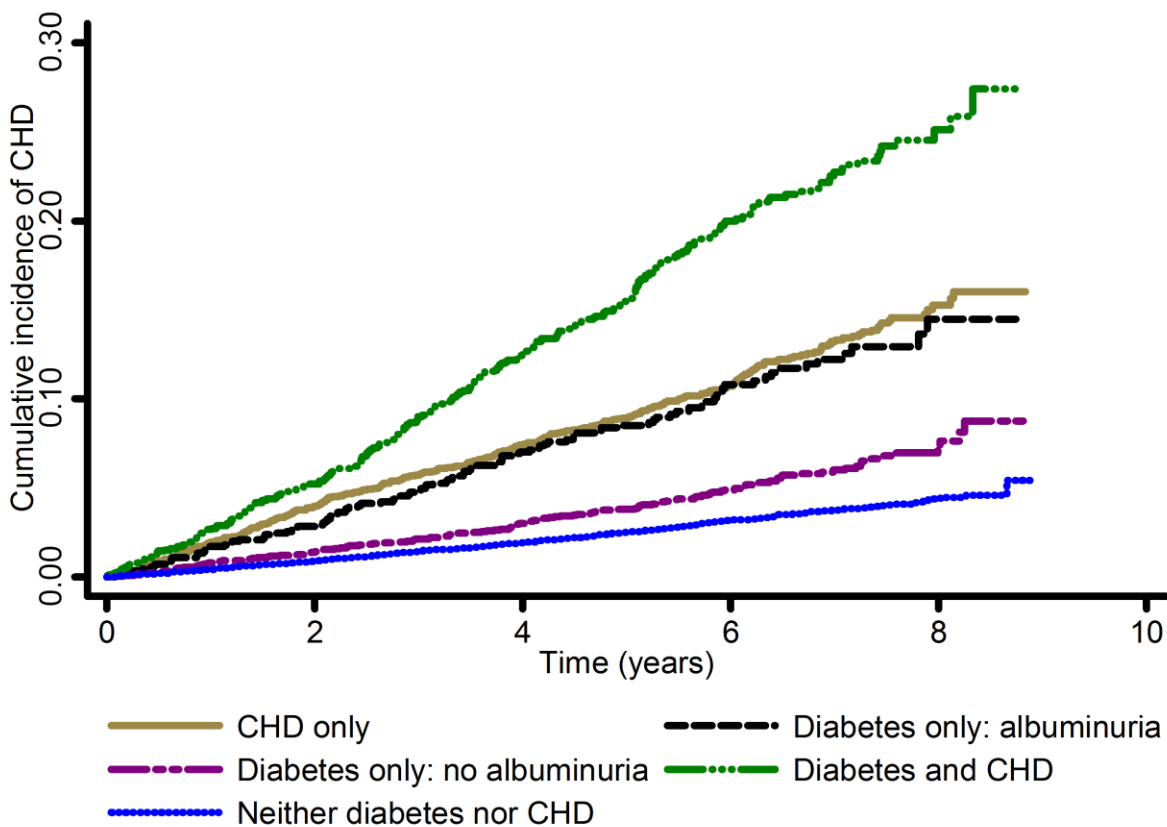

Abbreviations: CHD, coronary heart disease; CHD only, prevalent coronary heart disease; diabetes and CHD, diabetes and prevalent coronary heart disease; neither diabetes nor CHD, neither diabetes nor prevalent coronary heart disease  
Exposure groups: CHD only, Diabetes only: albuminuria, Diabetes only: no albuminuria, Diabetes and CHD, Neither diabetes nor CHD.

CHD was assessed using ECG evidence of MI or self-report of MI or revascularization.

Diabetes was defined as blood glucose (fasting  $\geq 126$  mg/dL or non-fasting  $\geq 200$  mg/dL) or self-reported use of diabetes medication.

Outcome: Y-axis

**Supplemental Figure 3. Cumulative incidence of A. myocardial infarction and B. fatal coronary heart disease by prevalent coronary heart disease and diabetes (insulin use and/or albuminuria) status**

P <0.01

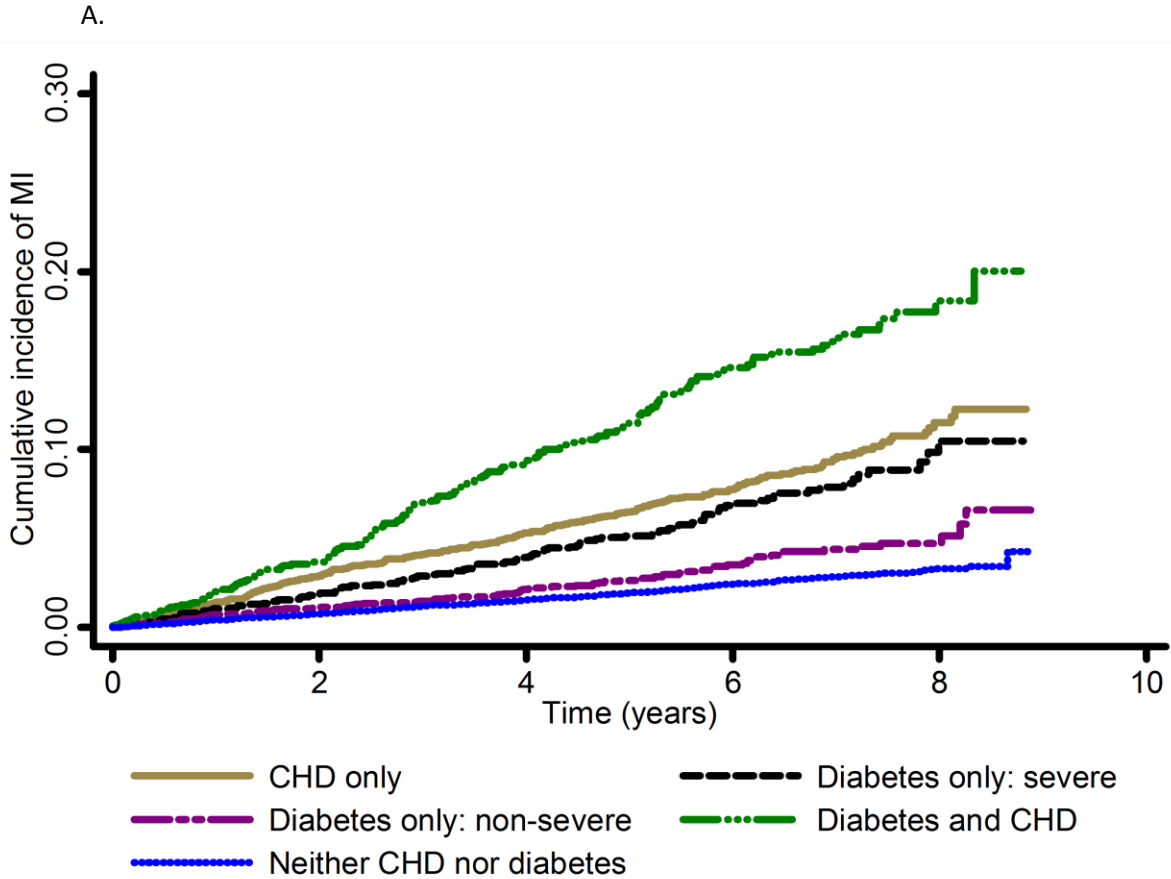

Abbreviations: CHD, coronary heart disease; CHD only, prevalent coronary heart disease; Diabetes only: severe, diabetes with insulin and/or albuminuria; Diabetes only: non-severe, diabetes with neither insulin nor albuminuria; diabetes and CHD, diabetes and prevalent coronary heart disease; neither diabetes nor CHD, neither diabetes nor prevalent coronary heart disease  
 Exposure groups: CHD only, Diabetes only: severe, Diabetes only: non-severe, Diabetes and CHD, Neither diabetes nor CHD  
 CHD was assessed using ECG evidence of MI or self-report of MI or revascularization.  
 Diabetes was defined as blood glucose (fasting  $\geq 126$  mg/dL or non-fasting  $\geq 200$  mg/dL) or self-reported use of diabetes medication.  
 Outcome: Y-axis

B.

P < 0.01

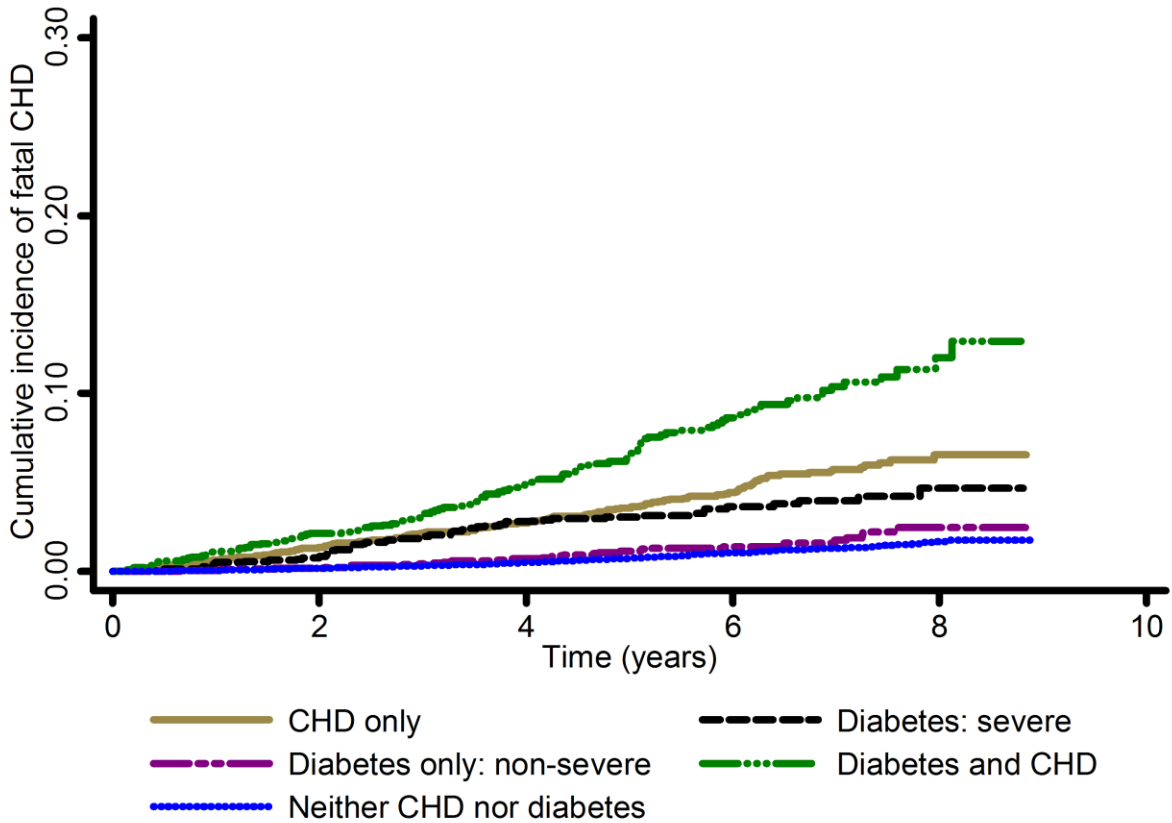

Abbreviations: CHD, coronary heart disease; CHD only, prevalent coronary heart disease; Diabetes only: severe, diabetes with insulin and/or albuminuria; Diabetes only: non-severe, diabetes with neither insulin nor albuminuria; diabetes and CHD, diabetes and prevalent coronary heart disease; neither diabetes nor CHD, neither diabetes nor prevalent coronary heart disease  
Exposure groups: CHD only, Diabetes only: severe, Diabetes only: non-severe, Diabetes and CHD, Neither diabetes nor CHD  
CHD was assessed using ECG evidence of MI or self-report of MI or revascularization.  
Diabetes was defined as blood glucose (fasting  $\geq 126$  mg/dL or non-fasting  $\geq 200$  mg/dL) or self-reported use of diabetes medication.  
Outcome: Y-axis

**Supplemental Figure 4. Cumulative incidence of A. myocardial infarction and B. fatal coronary heart disease by prevalent coronary heart disease and diabetes (insulin users and non-insulin users) status**

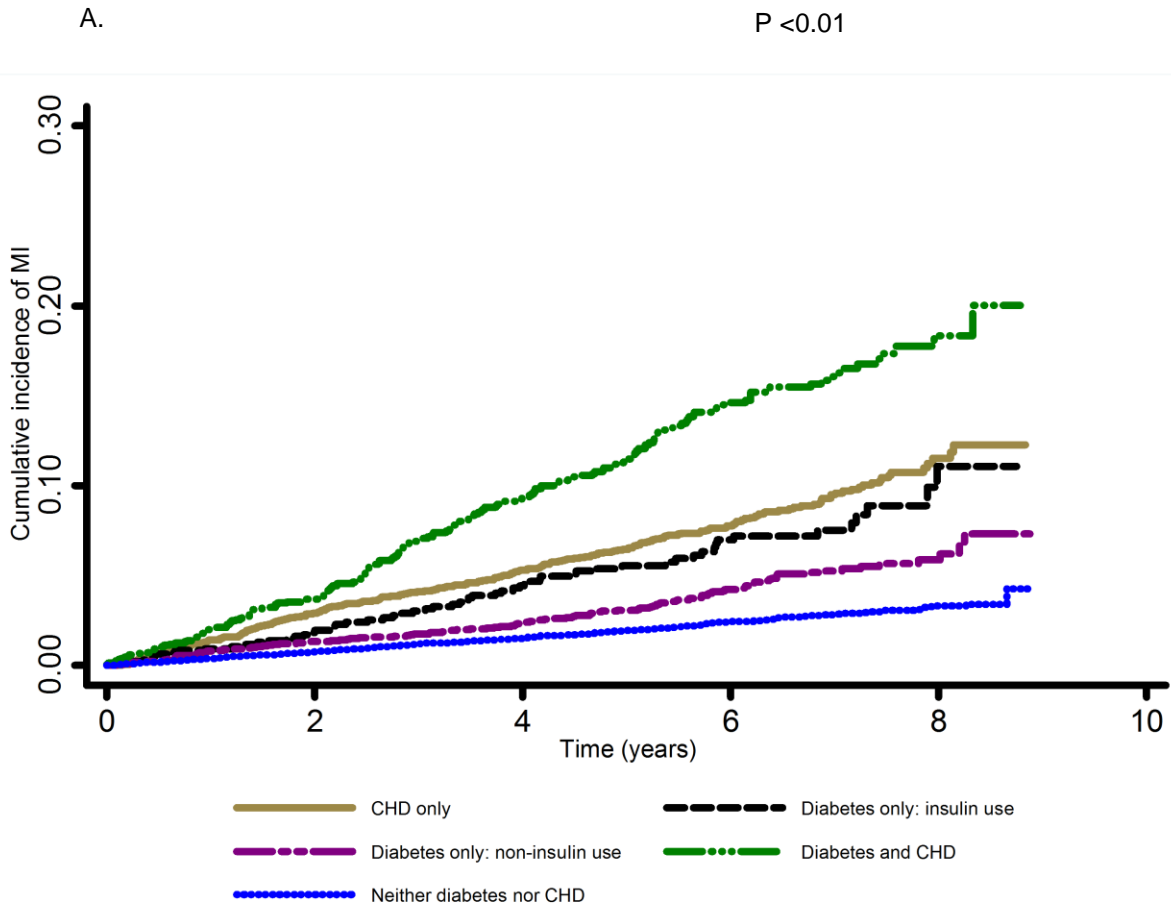

Abbreviations: MI, myocardial infarction; CHD only; prevalent coronary heart disease; diabetes and CHD, diabetes and prevalent coronary heart disease; neither diabetes nor CHD, neither diabetes nor prevalent coronary heart disease

Exposure groups: CHD only, Diabetes only: insulin use, Diabetes only: non-insulin use, Diabetes and CHD, Neither diabetes nor CHD

CHD was assessed using ECG evidence of MI or self-report of MI or revascularization.

Diabetes was defined as blood glucose (fasting  $\geq 126$  mg/dL or non-fasting  $\geq 200$  mg/dL) or self-reported use of diabetes medication.

Outcome: Y-axis

P < 0.01

B.

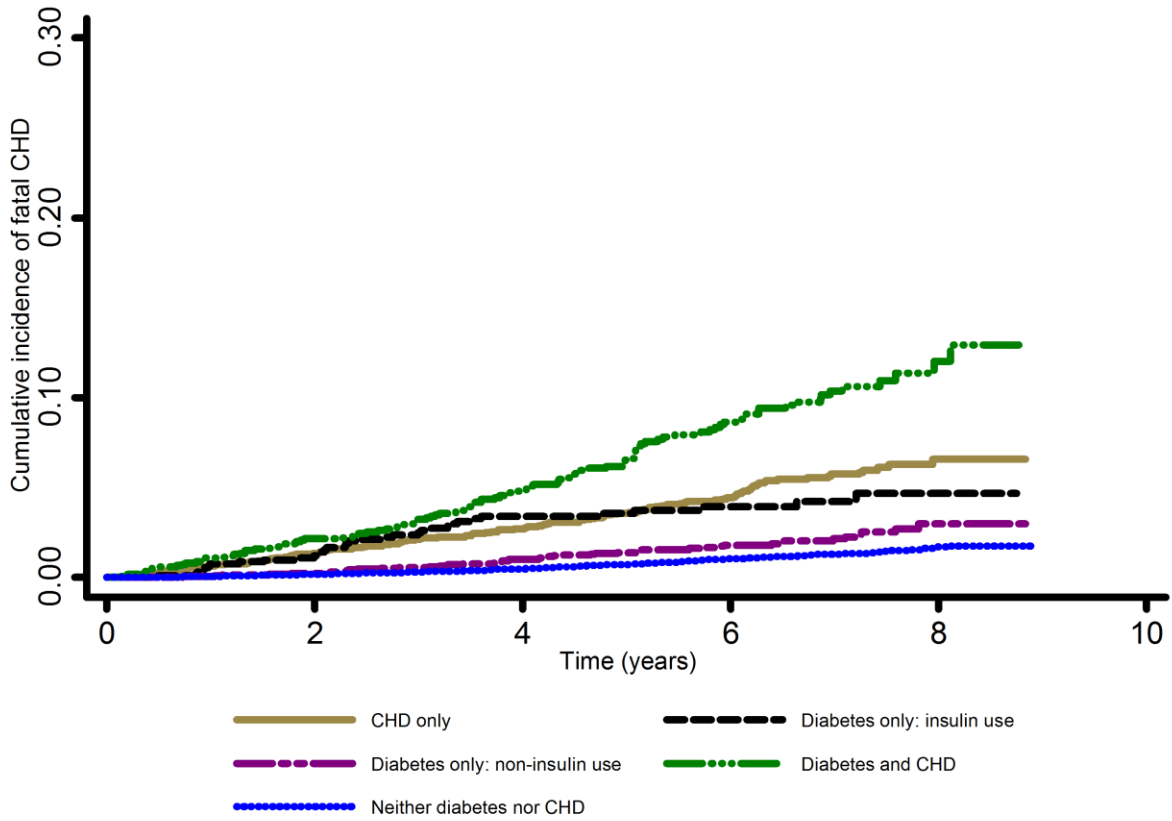

Abbreviations: Fatal CHD, fatal coronary heart disease; CHD only, prevalent coronary heart disease; diabetes and CHD, diabetes and prevalent coronary heart disease; neither diabetes nor CHD, neither diabetes nor prevalent coronary heart disease  
Exposure groups: CHD only, Diabetes only: insulin use, Diabetes only: non-insulin use, Diabetes and CHD, Neither diabetes nor CHD

CHD was assessed using ECG evidence of MI or self-report of MI or revascularization.

Diabetes was defined as blood glucose (fasting  $\geq 126$  mg/dL or non-fasting  $\geq 200$  mg/dL) or self-reported use of diabetes medication.

Outcome: Y-axis

**Supplemental Figure 5. Cumulative incidence of A. myocardial infarction and B. fatal coronary heart disease by prevalent coronary heart disease and diabetes (those with and without albuminuria) status**

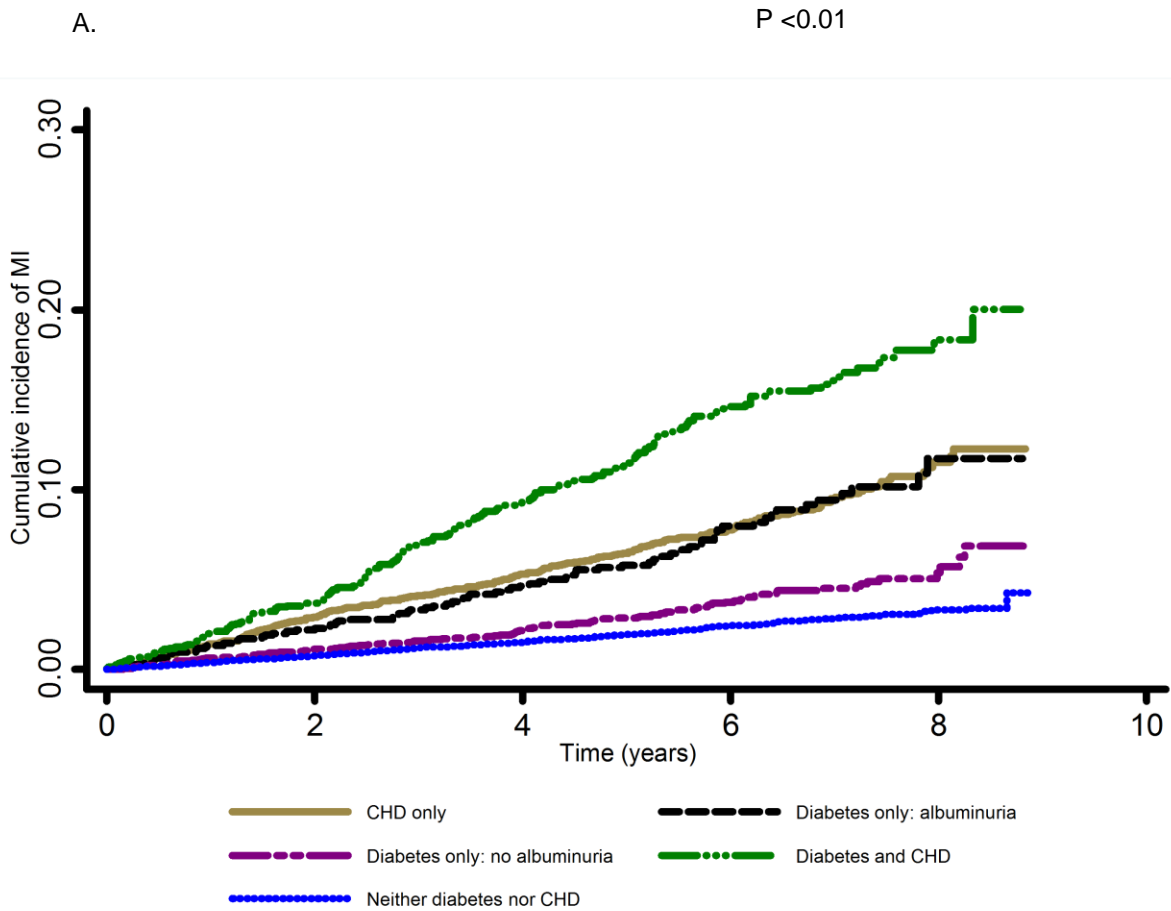

Abbreviations: MI, myocardial infarction; CHD only; prevalent coronary heart disease; diabetes and CHD, diabetes and prevalent coronary heart disease; neither diabetes nor CHD, neither diabetes nor prevalent coronary heart disease  
 Exposure groups: CHD only, Diabetes only: albuminuria, Diabetes only: no albuminuria, Diabetes and CHD, Neither diabetes nor CHD.

CHD was assessed using ECG evidence of MI or self-report of MI or revascularization.

Diabetes was defined as blood glucose (fasting  $\geq 126$  mg/dL or non-fasting  $\geq 200$  mg/dL) or self-reported use of diabetes medication.

Outcome: Y-axis



P < 0.01

B.

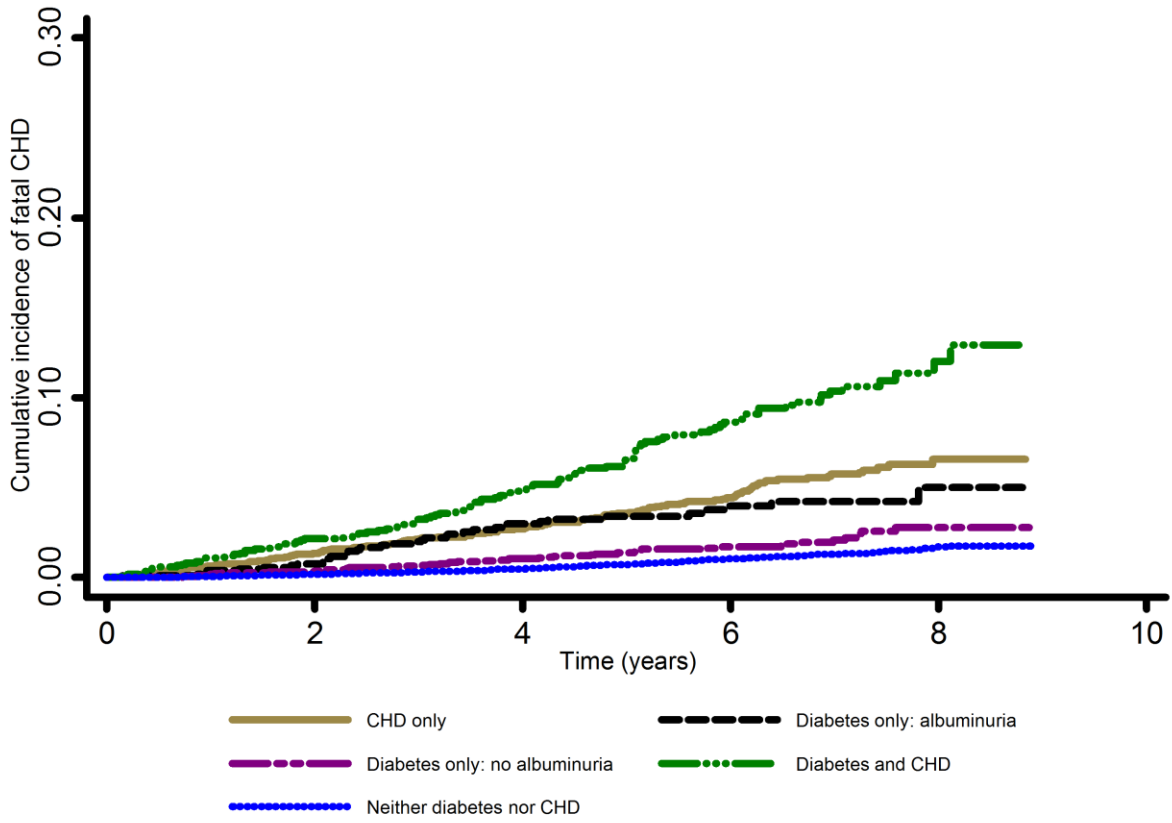

Abbreviations: Fatal CHD, fatal coronary heart disease; CHD only; prevalent coronary heart disease; diabetes and CHD, diabetes and prevalent coronary heart disease; neither diabetes nor CHD, neither diabetes nor prevalent coronary heart disease  
Exposure groups: CHD only, Diabetes only: albuminuria, Diabetes only: no albuminuria, Diabetes and CHD, Neither diabetes nor CHD.

CHD was assessed using ECG evidence of MI or self-report of MI or revascularization.

Diabetes was defined as blood glucose (fasting  $\geq 126$  mg/dL or non-fasting  $\geq 200$  mg/dL) or self-reported use of diabetes medication.

Outcome: Y-axis
